# Supplementary material
Source: bioRxiv or medRxiv preprint supplement (https://www.biorxiv.org/highwire/filestream/109661/field_highwire_adjunct_files/1/361626-2.pdf)

# Note S1. Start-Stop Assembly Quick-Start Guide

**Start-Stop Assembly: a functionally scarless DNA assembly framework optimised for metabolic engineering.**

George M. Taylor, Paweł M. Mordaka and John T. Heap\*

Imperial College Centre for Synthetic Biology, Department of Life Sciences, Imperial College London, London, SW7 2AZ, United Kingdom. \*Email: j.heap@imperial.ac.uk

## Prepare genetic parts and vectors:

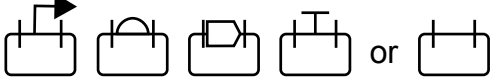

Review Start-Stop Assembly core vectors:

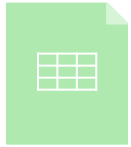

Table 1  
Vectors

if new vector needed

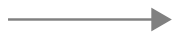

To make alternative destination vectors:

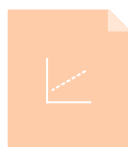

Figure S6  
Strategy

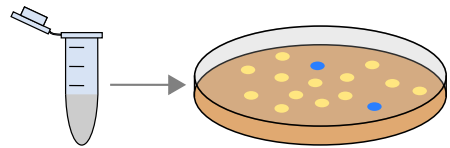

Review available parts:

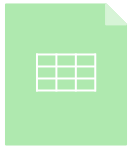

Table S3  
Parts

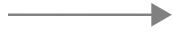

To construct and store new parts:

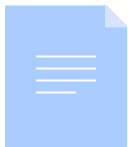

Note S2  
Strategy

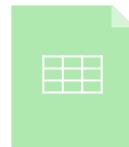

Table S1  
Pre/suffixes

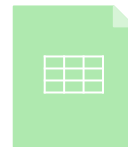

Table S2  
Primers

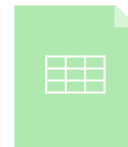

Table S8  
Primers

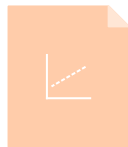

Figure S3  
Strategy

## Plan assembly:

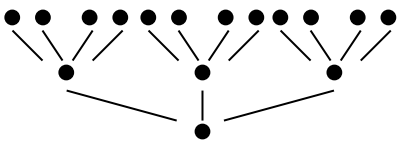

For choice of Start-Stop Assembly vectors:

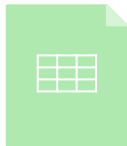

Table 1  
Vectors

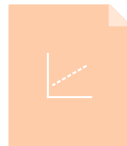

Figure 4  
Hierarchy

If spacers required:

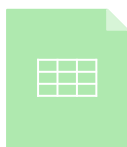

Table S5  
Linkers

Generic examples:

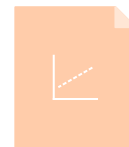

Figures S12-14  
Strategies

Specific examples:

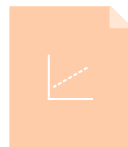

Figures S16-20  
Assemblies

## Perform Start-Stop Assembly reactions:

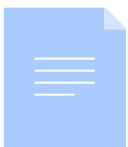

Note S3  
Lab Protocol

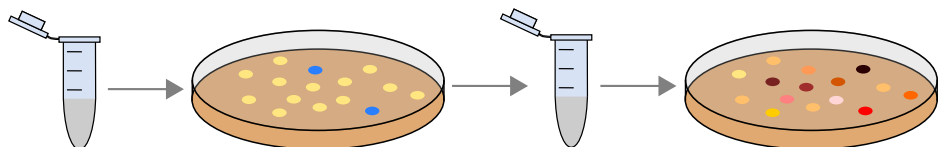

Supplement: Supplementary file [file 361626-2.pdf]
